# Supplementary material for: From Field to Waste Valorization: A Preliminary Study Exploring the Impact of the Wine Supply Chain on the Phenolic Profile of Three Sardinian Pomace Extracts
Source: MDPI journal article supplement (doi:10.3390/foods13091414), 2024-05-04
Supplement: s1 [file s1]

## Supplementary material

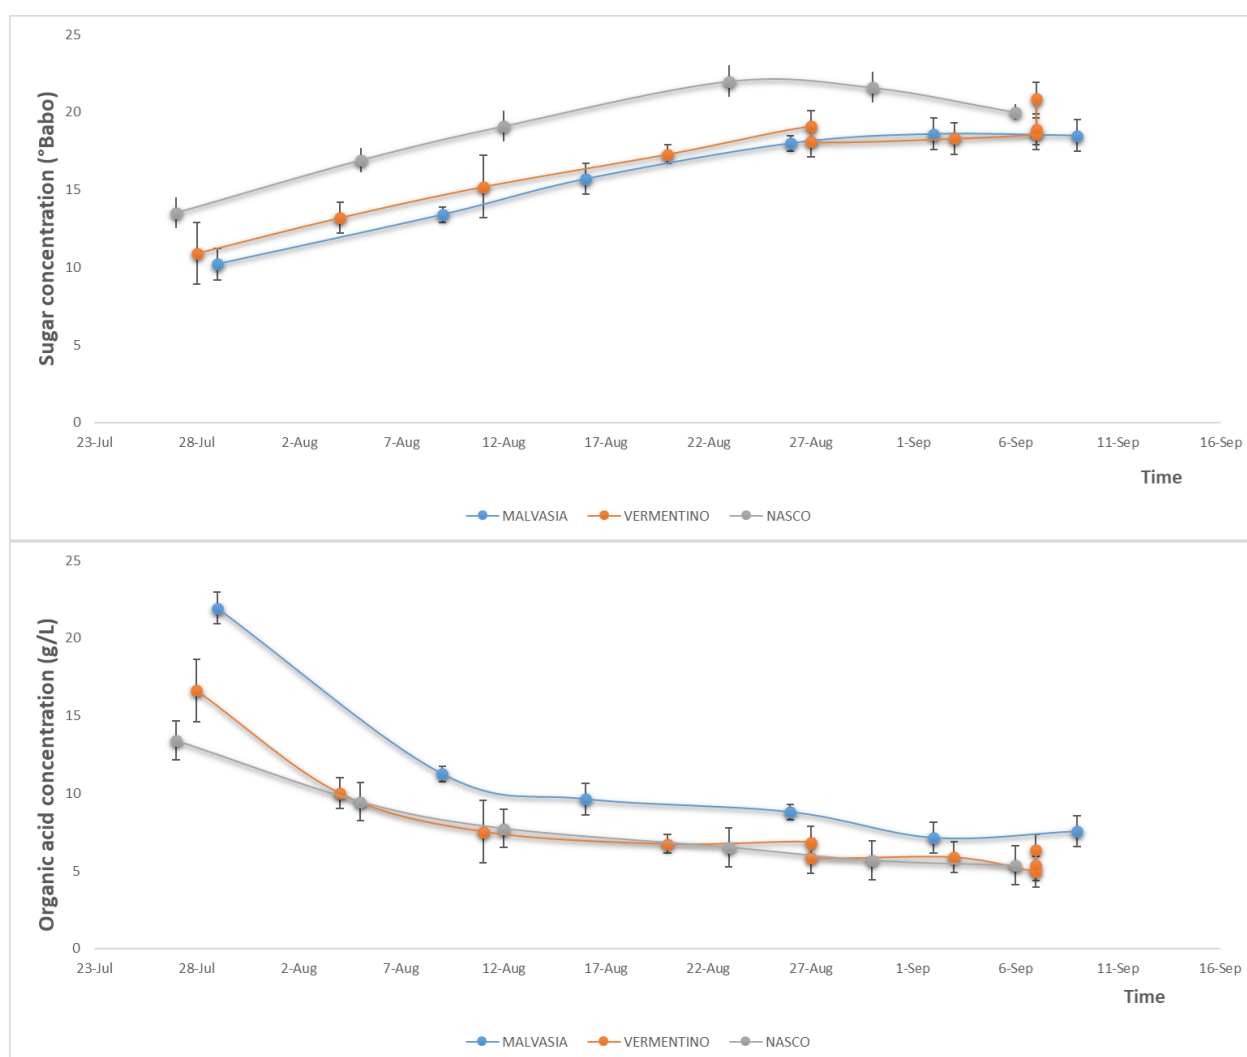

**Figure S1.** Concentrations of sugars (upper panel) and organic acid (lower panel) of grapevines cultivars (Malvasia, Vermentino, and Nasco) during the ripening. Mean values  $\pm$  standard deviations are reported (n = 6).

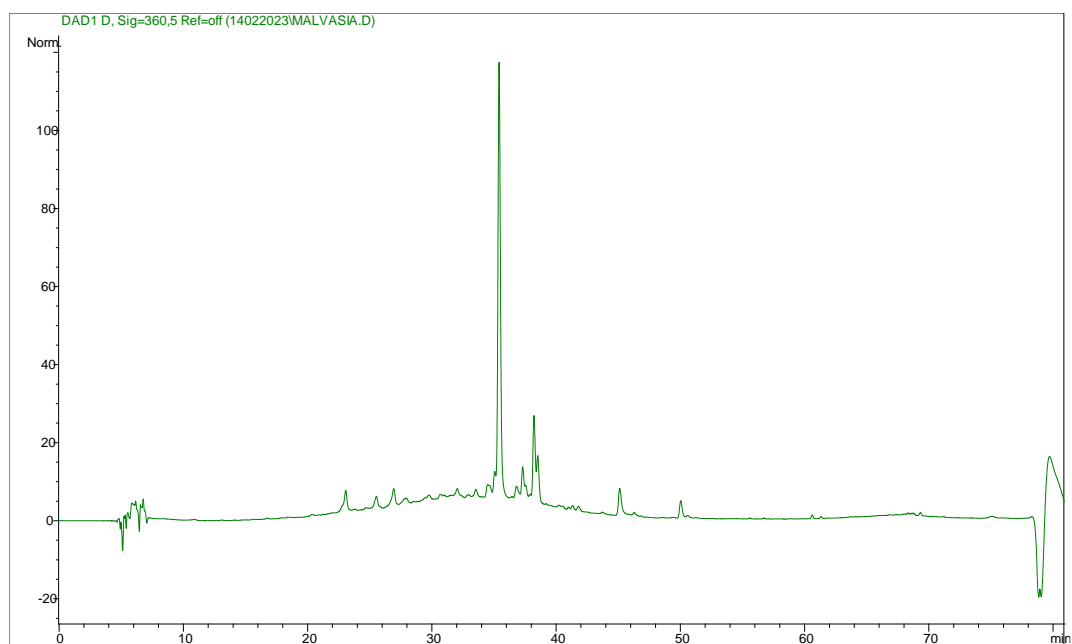

**Figure S2.** Chromatogram of the extract of Malvasia pomace recorded at 360 nm.

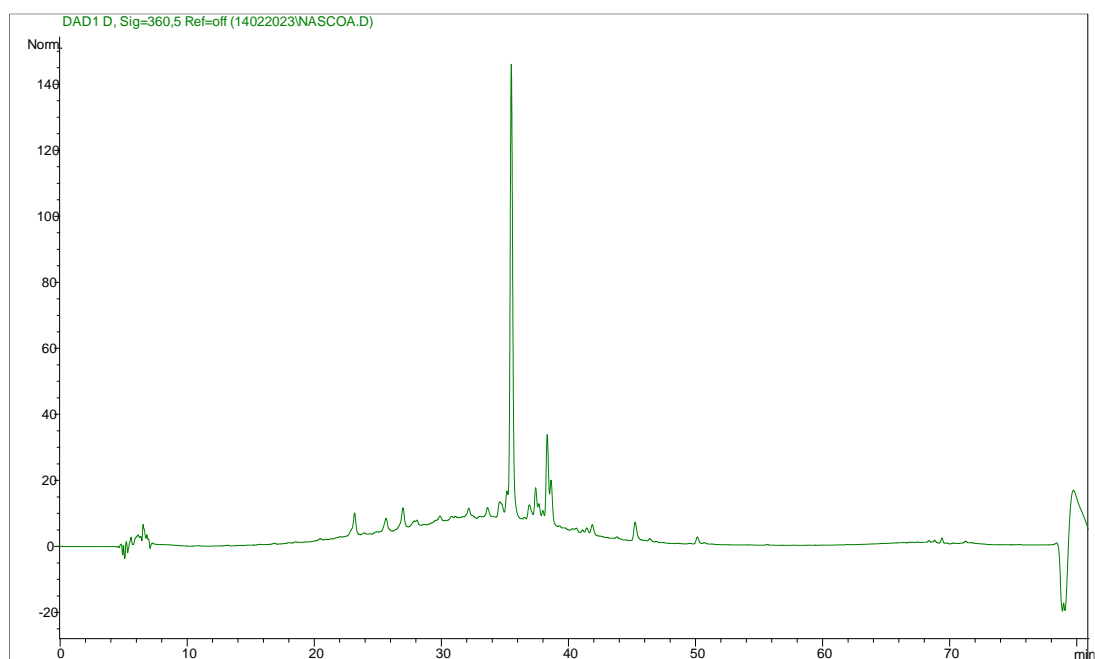

**Figure S3.** Chromatogram of the extract of Nasco pomace recorded at 360 nm.

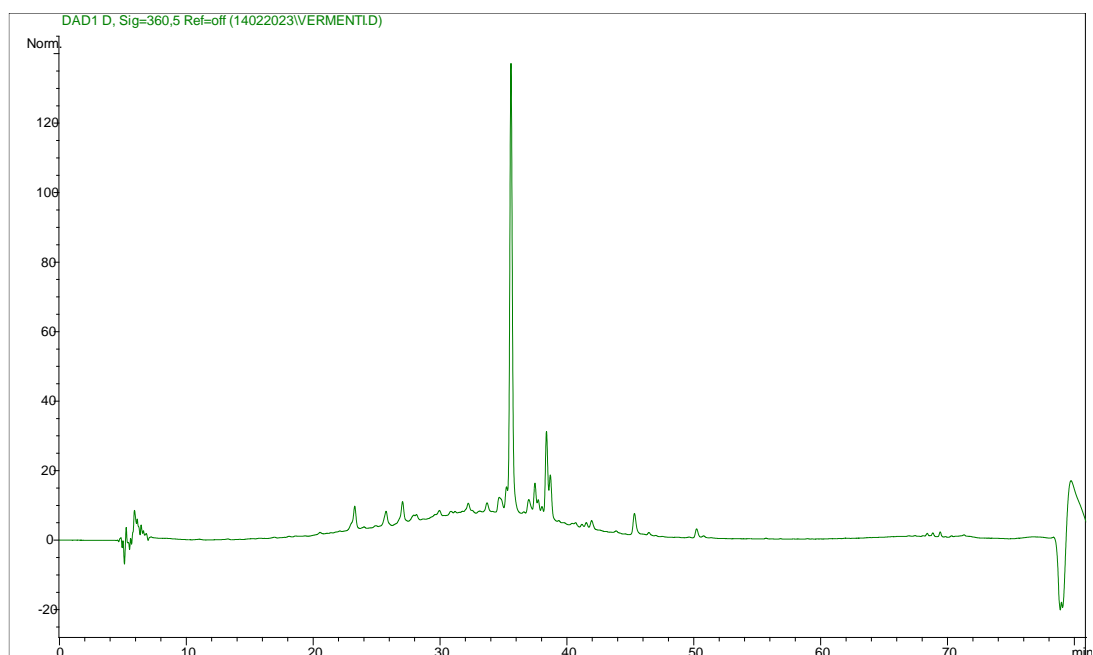

**Figure S4.** Chromatogram of the extract of Vermentino pomace recorded at 360 nm.

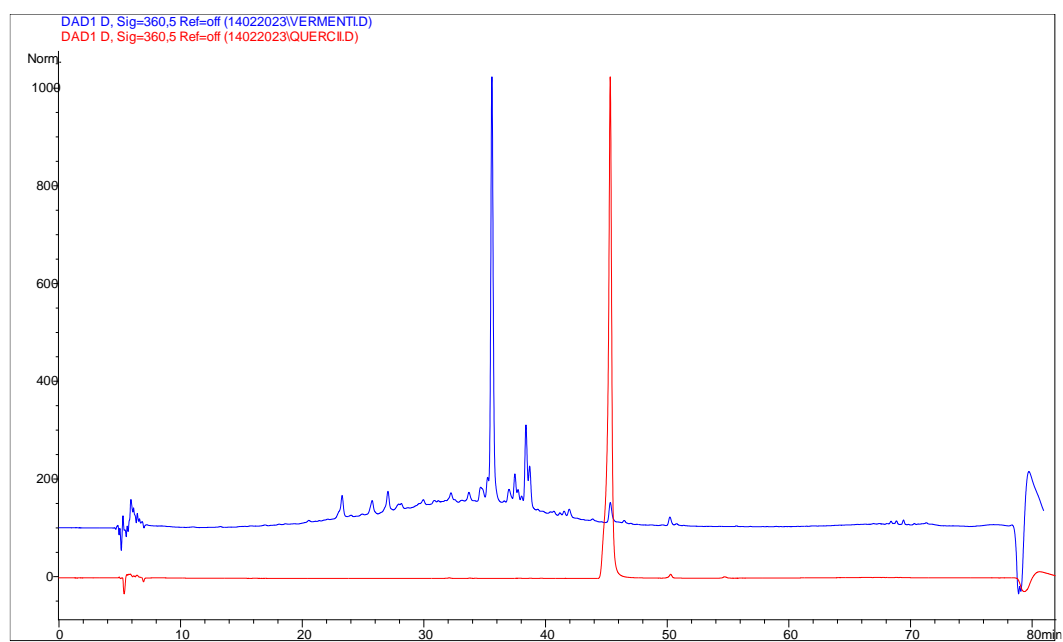

**Figure S5.** Chromatogram of the extract of Vermentino pomace recorded at 360 nm vs analytical standard of quercetin.

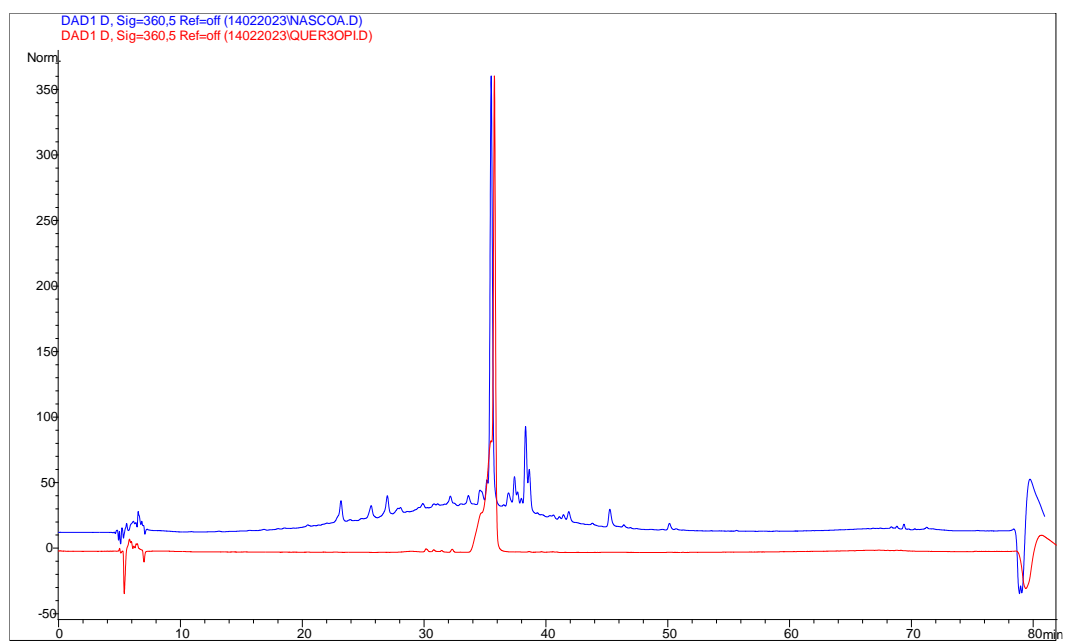

**Figure S6.** Chromatogram of the extract of Nasco pomace recorded at 360 nm vs analytical standard of quercetin 3-o-glucoside.
